# Supplementary material for: A randomized comparison of three data collection models for the measurement of parent experiences with diabetes outpatient care
Source: PubMed Central journal article supplement (PMC6149010; doi:10.1186/s12874-018-0557-z), 2018-09-20
Supplement: 12874_2018_557_MOESM1_ESM.pdf [file 12874_2018_557_MOESM1_ESM.pdf]

|  |  |  |  |
|--|--|--|--|
|  |  |  |  |
|--|--|--|--|

|  |  |  |  |  |  |  |  |
|--|--|--|--|--|--|--|--|
|  |  |  |  |  |  |  |  |
|--|--|--|--|--|--|--|--|

# Your experiences with the children's outpatient clinic

⊥ The questions below concern your experiences with the children's outpatient clinic your child attends for diabetes.

## Arrival and waiting

1. **Are you and your child well received at the outpatient clinic?**

- Not at all
- To a small extent
- To some extent
- To a large extent
- To a very large extent

2. **Do you feel there's a lot of waiting at the outpatient clinic?**

- Not at all
- To a small extent
- To some extent
- To a large extent
- To a very large extent

3. **Do you find the waiting room satisfactory?**

- Not at all
- To a small extent
- To some extent
- To a large extent
- To a very large extent

## Organisation

4. **Do you feel that the outpatient clinic is well organised?**

- Not at all
- To a small extent
- To some extent
- To a large extent
- To a very large extent
- Not applicable / Don't know*

5. **Do you feel that the doctors and nurses cooperate well?**

- Not at all
- To a small extent
- To some extent
- To a large extent
- To a very large extent
- Not applicable / Don't know*

6. **Do you feel that the person you have the appointment with is well prepared?**

- Not at all
- To a small extent
- To some extent
- To a large extent
- To a very large extent
- Not applicable / Don't know*

## The nurses

7. **Do you and your child see the same nurses every time you attend the outpatient clinic?**

- Not at all
- To a small extent
- To some extent
- To a large extent
- To a very large extent
- Not applicable / Don't know*

8. **Do you and your child get enough time with the nurses?**

- Not at all
- To a small extent
- To some extent
- To a large extent
- To a very large extent
- Not applicable / Don't know*

**9. Do the nurses appear to know a lot about diabetes and diabetes treatment?**

- Not at all
- To a small extent
- To some extent
- To a large extent
- To a very large extent
- Not applicable / Don't know*

**10. Do you feel that the nurses show care and concern for your child?**

- Not at all
- To a small extent
- To some extent
- To a large extent
- To a very large extent
- Not applicable / Don't know*

**The doctor**

The questions below are about the doctor. If you see more than one doctor, please give us your overall assessment of all the doctors you see.

**11. Do you and your child see the same doctor every time you attend the outpatient clinic?**

- Not at all
- To a small extent
- To some extent
- To a large extent
- To a very large extent
- Not applicable / Don't know*

**12. Do you and your child get enough time with the doctor?**

- Not at all
- To a small extent
- To some extent
- To a large extent
- To a very large extent
- Not applicable / Don't know*

**13. Does the doctor appear to know a lot about diabetes and diabetes treatment?**

- Not at all
- To a small extent
- To some extent
- To a large extent
- To a very large extent
- Not applicable / Don't know*

**14. Do you feel that the doctor shows care and concern for your child?**

- Not at all
- To a small extent
- To some extent
- To a large extent
- To a very large extent
- Not applicable / Don't know*

**More about what is discussed at appointments**

**15. In your opinion, do the topics discussed at the appointments meet your child's needs?**

- Not at all
- To a small extent
- To some extent
- To a large extent
- To a very large extent
- Not applicable / Don't know*

**16. Is it clear to you and your child what should be followed up before the next appointment?**

- Not at all
- To a small extent
- To some extent
- To a large extent
- To a very large extent
- Not applicable / Don't know*

**17. Do you and your child have a say in what should be followed up before the next appointment?**

- Not at all
- To a small extent
- To some extent
- To a large extent
- To a very large extent
- Not applicable / Don't know*

**Being a parent/guardian at the clinic**

**18. Are your views as a parent/guardian taken seriously?**

- Not at all
- To a small extent
- To some extent
- To a large extent
- To a very large extent
- Not applicable / Don't know*

19. Do you get enough time for conversations without your child being present?

- Not at all
- To a small extent
- To some extent ⊥
- To a large extent
- To a very large extent
- Not applicable / Don't know*

20. Are you given satisfactory information and guidance on how to follow up on your child's diabetes treatment?

- Not at all
- To a small extent
- To some extent
- To a large extent
- To a very large extent
- Not applicable / Don't know*

21. Do you get the support you need to let your child take more responsibility for his or her diabetes treatment?

- Not at all
- To a small extent
- To some extent
- To a large extent
- To a very large extent
- Not applicable / Don't know*

### Information and training

22. Do you receive satisfactory information about the results of tests and examinations?

- Not at all
- To a small extent
- To some extent
- To a large extent
- To a very large extent

23. Do you receive satisfactory information about the development in your child's health and the risk of complications?

- Not at all
- To a small extent
- To some extent
- To a large extent ⊥
- To a very large extent
- Not applicable / Don't know*

24. Do you receive satisfactory information from the outpatient clinic about available devices/equipment?

- Not at all
- To a small extent
- To some extent
- To a large extent
- To a very large extent
- Not applicable / Don't know*

25. Do you and your child receive good training in managing the devices/equipment?

- Not at all
- To a small extent
- To some extent
- To a large extent ⊥
- To a very large extent
- Not applicable / Don't know*

### Availability

26. In your opinion, does your child have access to the best possible devices/equipment?

- Not at all
- To a small extent
- To some extent
- To a large extent
- To a very large extent
- Not applicable / Don't know*

27. Does your child have satisfactory access to a nutritionist?

- Not at all
- To a small extent
- To some extent
- To a large extent
- To a very large extent
- Not applicable / Don't know*

28. Does your child have satisfactory access to a psychologist?

- Not at all
- To a small extent
- To some extent ⊥
- To a large extent
- To a very large extent
- Not applicable / Don't know*

29. Is it easy to get in touch with the outpatient clinic outside of appointments?

- Not at all
- To a small extent
- To some extent
- To a large extent
- To a very large extent
- Not applicable / Don't know*

⊥

30. How do you feel about the number of appointments at the outpatient clinic?

- Too few
- A sufficient amount
- Too many
- Not applicable / Don't know*

### Usefulness

31. Do you feel that your child benefits from attending the outpatient clinic?

- Not at all
- To a small extent
- To some extent
- To a large extent
- To a very large extent
- Not applicable / Don't know*

32. Do you, as a parent/guardian, benefit from attending the outpatient clinic?

- Not at all
- To a small extent
- To some extent
- To a large extent
- To a very large extent
- Not applicable / Don't know*

### Other questions

33. Does the follow-up at the outpatient clinic make you and your child more capable to live a good life with diabetes?

- Not at all
- To a small extent
- To some extent
- To a large extent
- To a very large extent
- Not applicable / Don't know*

34. All in all, how dissatisfied or satisfied are you with how the outpatient clinic has followed up on your child and the diabetes treatment?

- Very dissatisfied
- Rather dissatisfied
- Both dissatisfied and satisfied
- Rather satisfied
- Very satisfied

35. All in all, how dissatisfied or satisfied are you with how the outpatient clinic has met you as a parent/guardian?

- Very dissatisfied
- Rather dissatisfied
- Both dissatisfied and satisfied
- Rather satisfied
- Very satisfied

⊥

### Background questions

36. In the last year, how many times have you been present for all or part of your child's appointment?

- Never
- 1 time
- 2 times
- 3 times
- 4 or more times

⊥

37. Are you male or female?

- Male
- Female

38. What age are you?

Number of years

39. What is your highest level of educational attainment?

- Primary school
- Secondary school
- Higher education/university (up to 4 years)
- Higher education/university (4+ years)

40. Do you live with the child's other parent/guardian?

- Yes
- No
- Not applicable*

⊥
